# Supplementary material for: CmNAC25 targets CmMYB6 to positively regulate anthocyanin biosynthesis during the post-flowering stage in chrysanthemum
Source: BMC Biol. 2023 Oct 9;21:211. doi: 10.1186/s12915-023-01719-7 (PMC10561465; doi:10.1186/s12915-023-01719-7)
Supplement: Supplementary file 1 — Additional file 1: Table S1. Summary of transcriptome sequencing data for ‘Arctic Queen’ petals at three flowering stages. [file 12915_2023_1719_MOESM1_ESM.xlsx]

## Sheet: Sheet1
Additional file 1:Table S1. Summary of transcriptome sequencing data for chrysanthemum ‘Arctic Queen’ petals at three senescence stages
	Samples at three stages
	S1a*	S1b	S1c	S2a	S2b	S2c	S3a	S3b	S3c
Total raw reads (Mb)	66.46	68.7	66.32	66.31	68.71	68.69	66.45	68.64	68.66
Total clean reads (Mb)	65.55	67.33	65.27	65.36	67.29	67.32	65.39	67.08	66.89
Clean reads Q20 (%)	98.53	98.61	98.59	98.53	98.55	98.56	98.58	98.49	98.46
Clean reads ratio (%)	98.63	98.01	98.42	98.56	97.94	98.01	98.4	97.72	97.42
Total number of unigenes	139504
Total length of unigenes	158807686
Mean length of unigenes (bp)	1138
N50 (bp)	1773
GC (%)	39.09
*Three biological replicates for each stage are indicated by a, b, and c.
